# Supplementary material for: Cu(ii) salen and 1,2,4-triazole complexes from thiosemicarbazone: synthesis, physicochemical and structural properties and cytotoxic activities
Source: Royal Society of Chemistry journal article supplement (doi:10.1039/c9nj04455h), 2020-01-01
Supplement: c9nj04455h1.pdf [file c9nj04455h1.pdf]

## Supporting Information

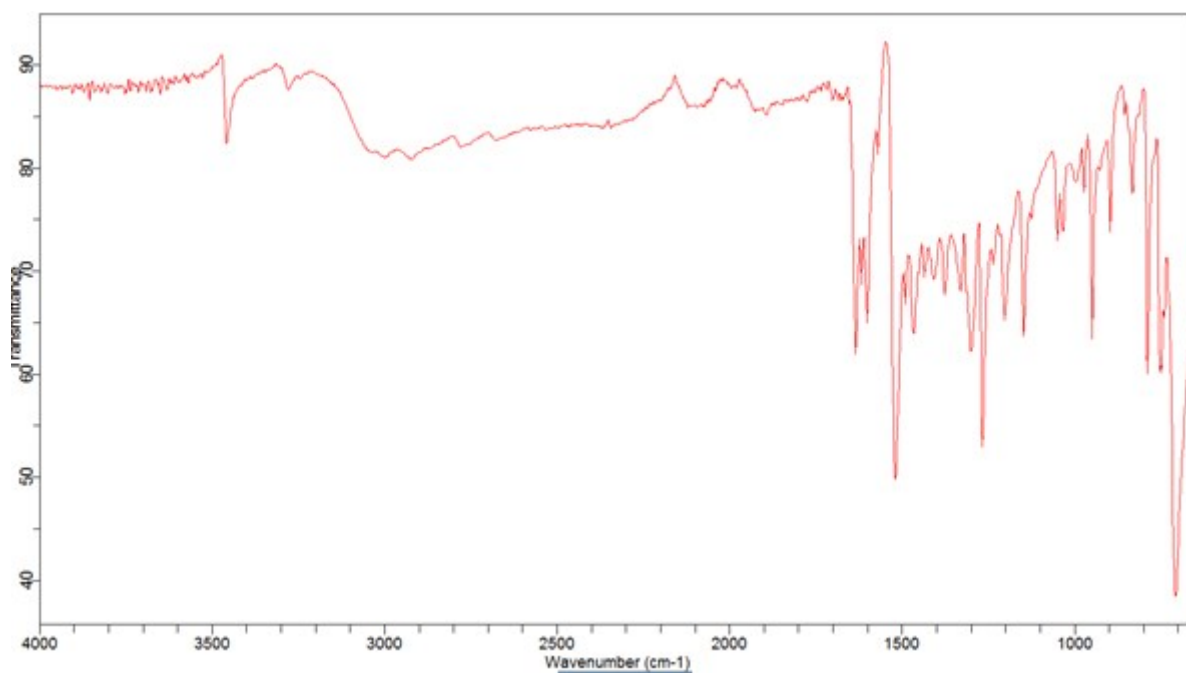

**Figure 1:** IR spectrum of starting material (**H<sub>2</sub>L**)

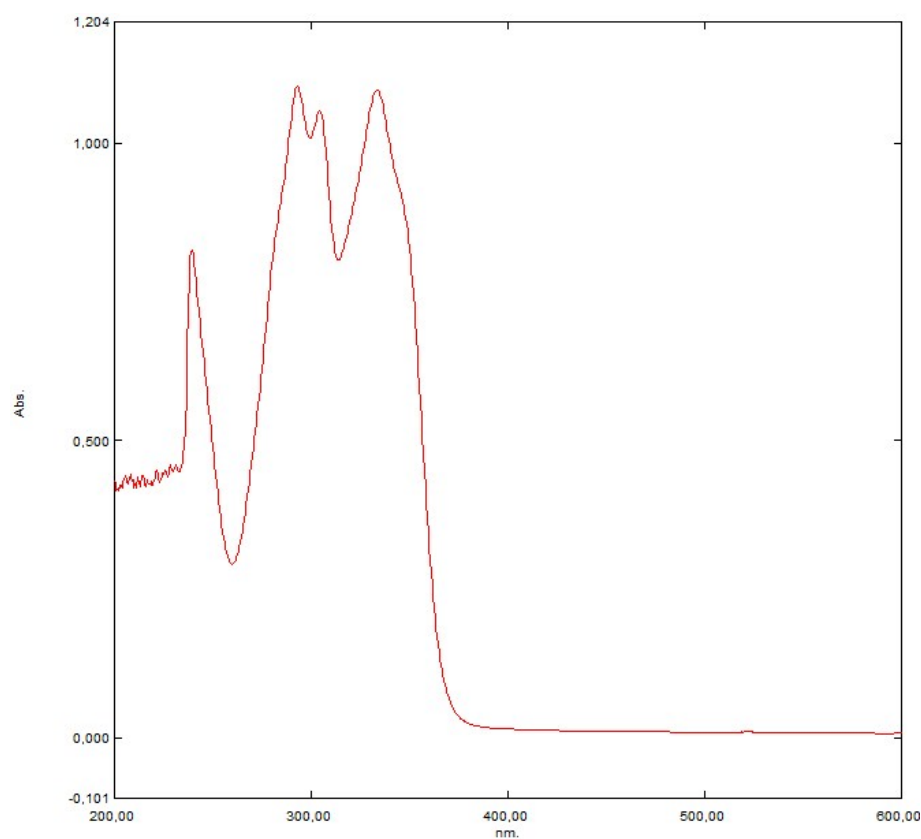

**Figure 2:** UV-Vis spectrum of starting material (**H<sub>2</sub>L**) ( $5 \cdot 10^{-5}$  M, CHCl<sub>3</sub>)

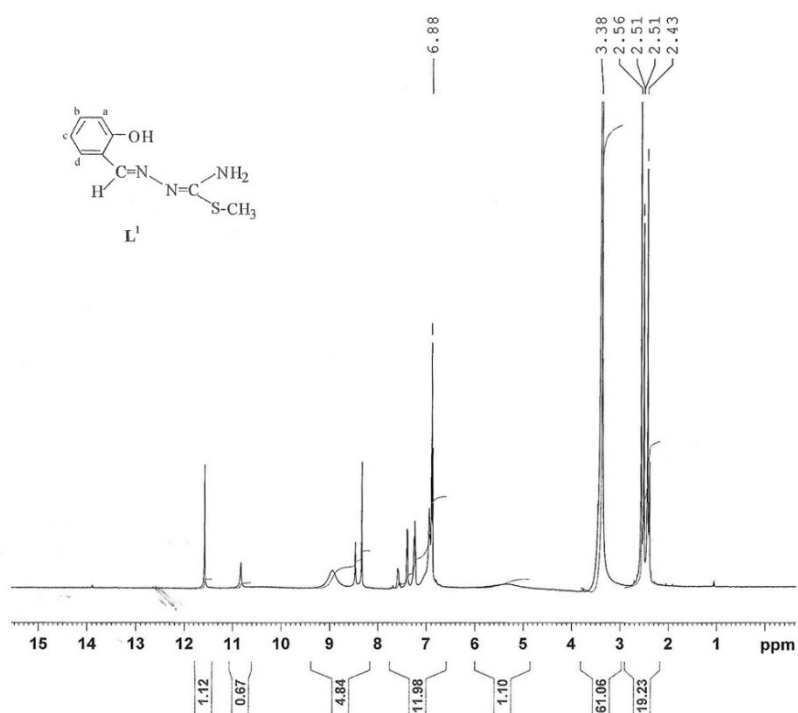

**Figure 3:**  $^1\text{H-NMR}$  Spectrum of starting material ( $\text{H}_2\text{L}$ ) (Solvent:  $\text{d}_6\text{-DMSO}$ )

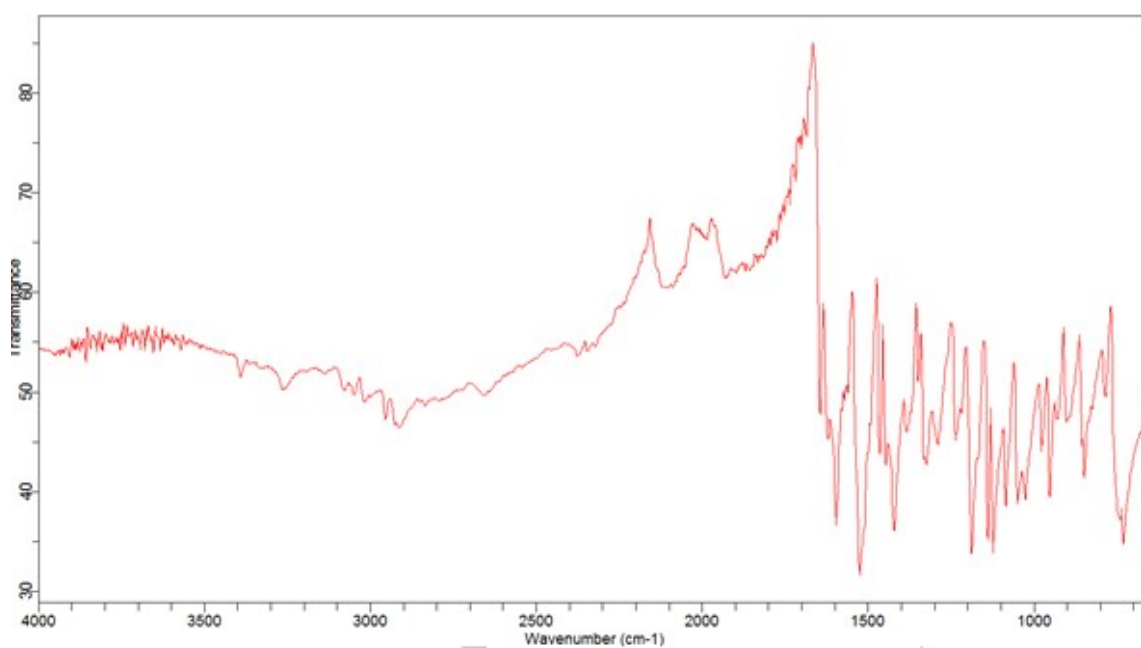

**Figure 4:** IR spectrum of complex I (Method A)

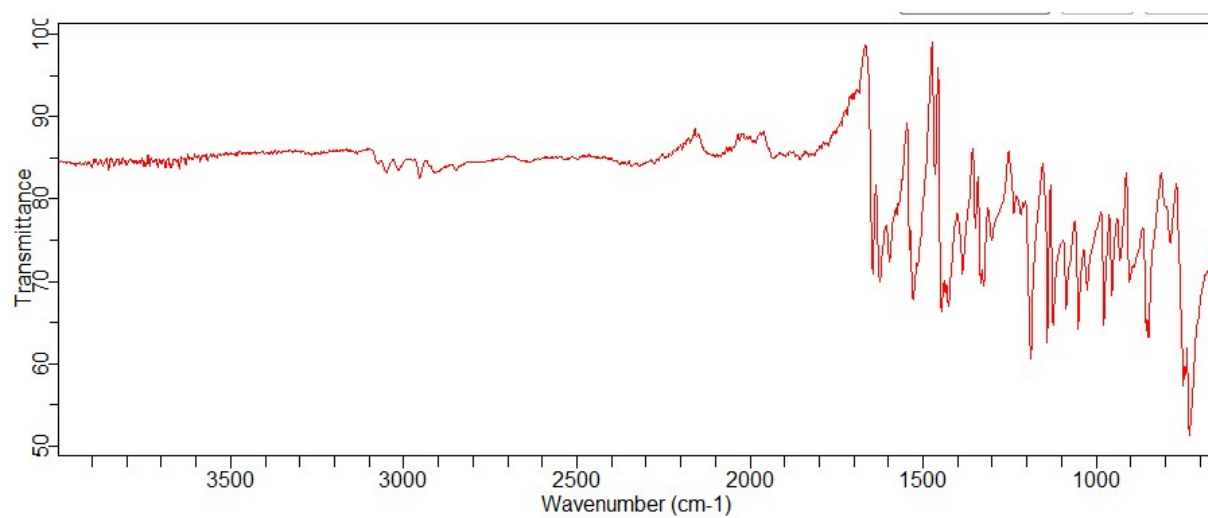

**Figure 5:** IR spectrum of complex I (Method B)

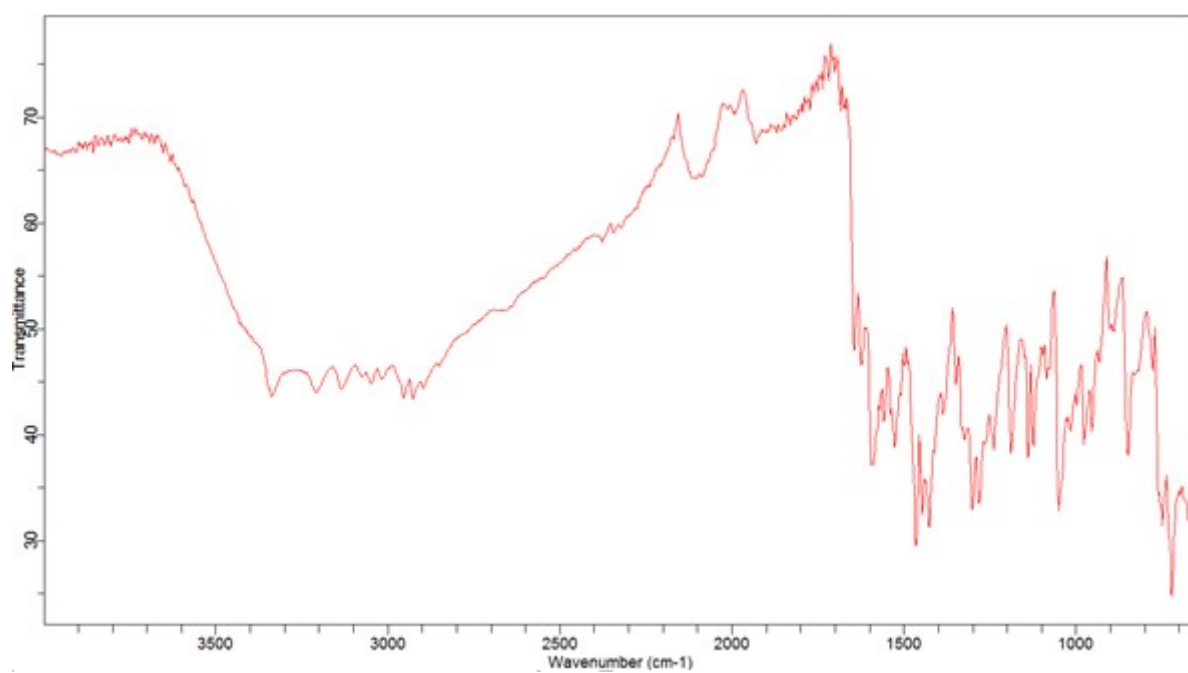

**Figure 6:** IR spectrum of complex II

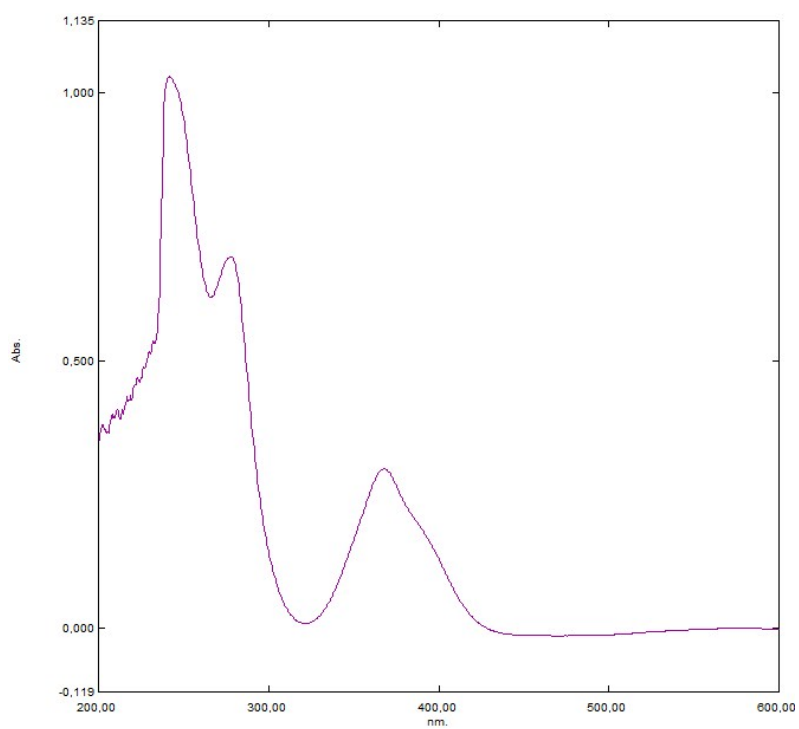

**Figure 7:** UV-Vis spectrum of complex **I** ( $5.10^{-5}\text{M}$ ,  $\text{CHCl}_3$ )

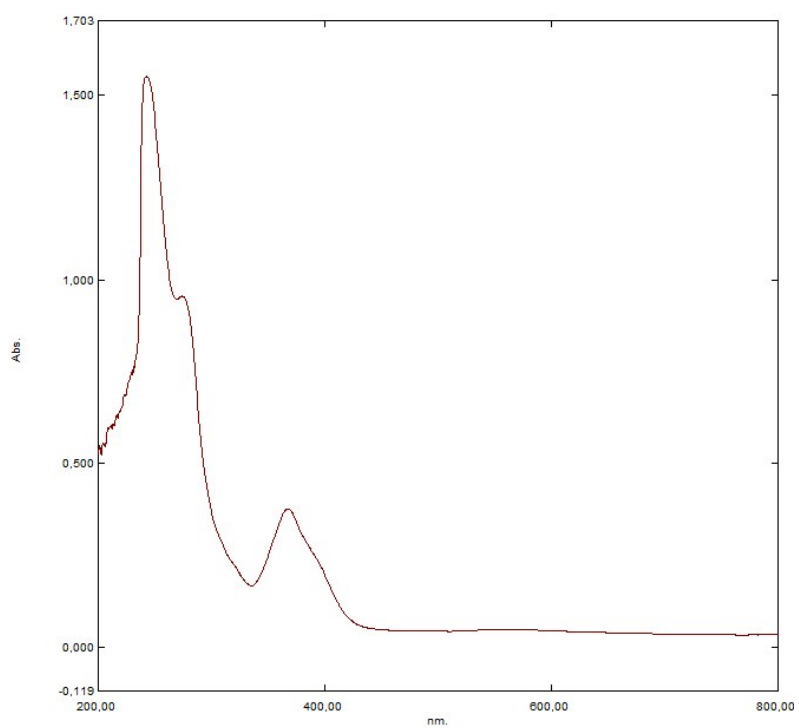

**Figure 8:** UV-Vis spectrum of complex **II** ( $5.10^{-5}\text{M}$ ,  $\text{CHCl}_3$ )

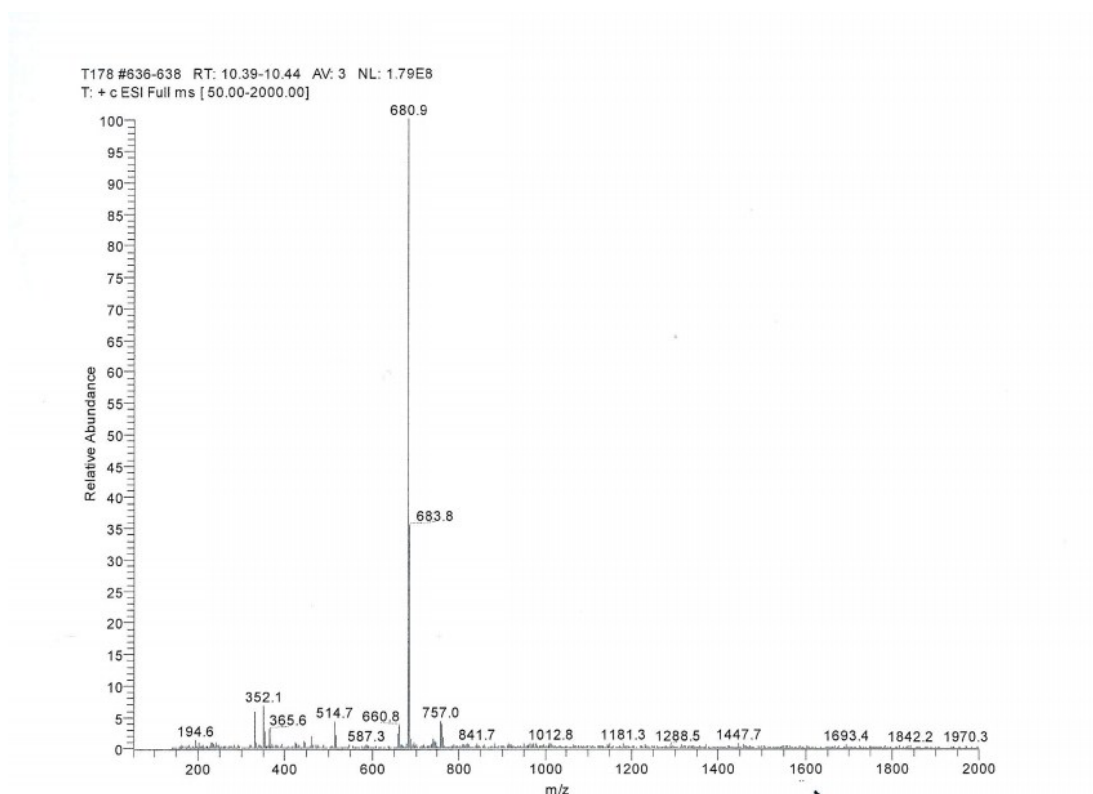

**Figure 9:** ESI-MS spectrum of complex I

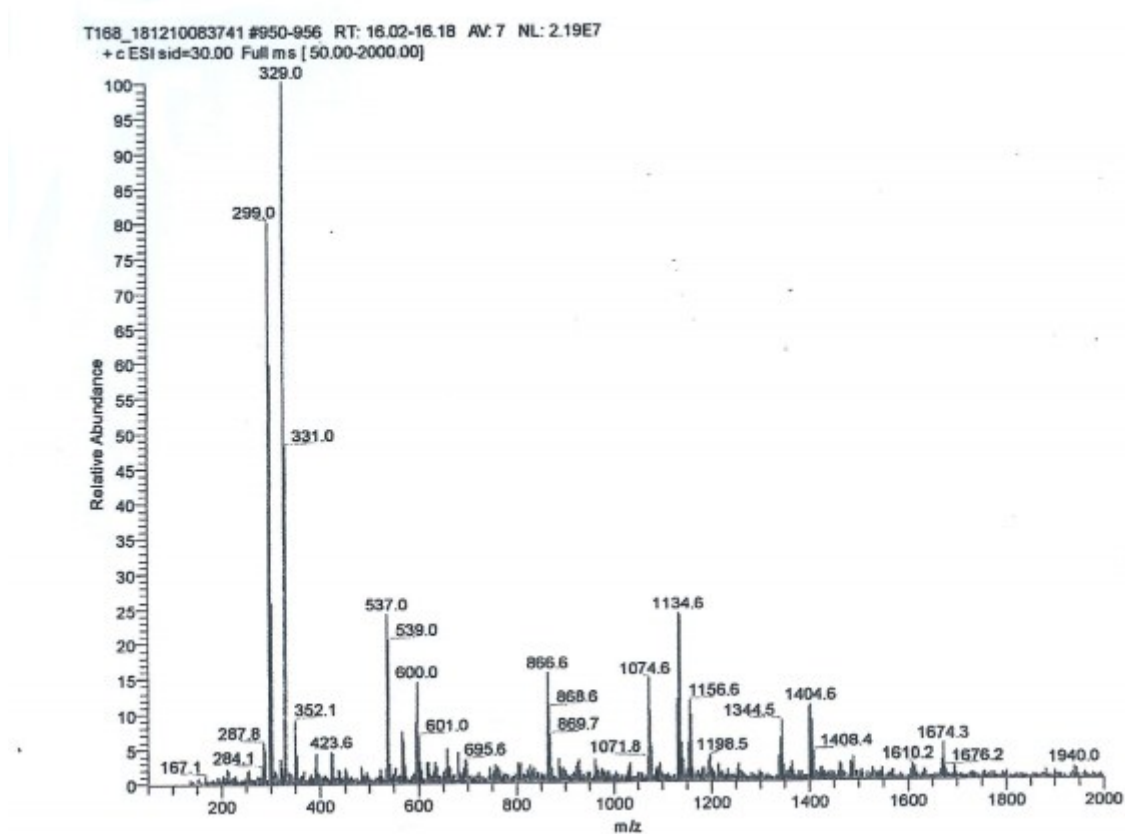

**Figure 10:** ESI-MS spectrum of complex II

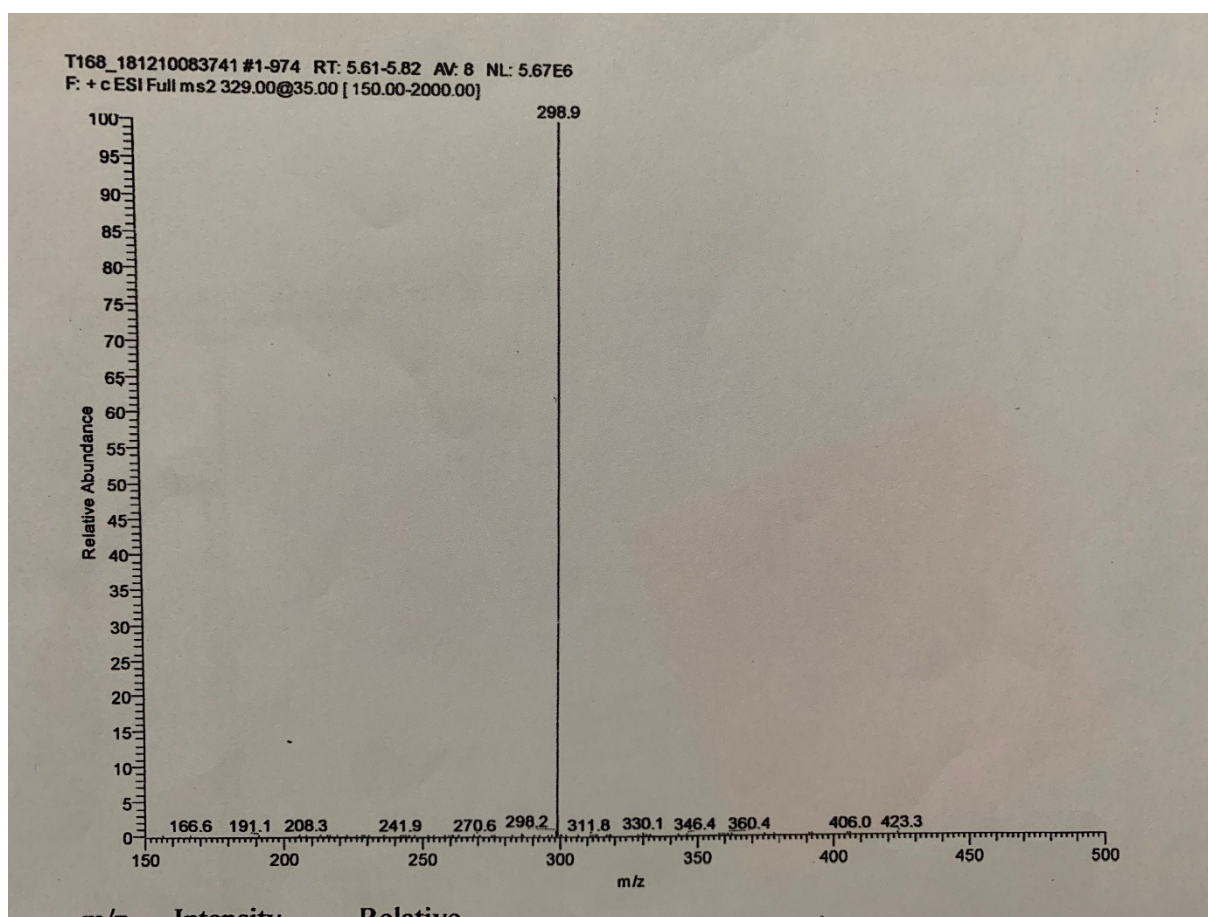

**Figure 11:** ESI-MS2 spectrum at  $m/z$  329 of complex **II**
